# Supplementary material for: Relationship between Macrophage and Radiosensitivity in Human Primary and Recurrent Glioblastoma: In Silico Analysis with Publicly Available Datasets
Source: MDPI journal article supplement (doi:10.3390/biomedicines10020292), 2022-01-27
Supplement: s1 [file s1]

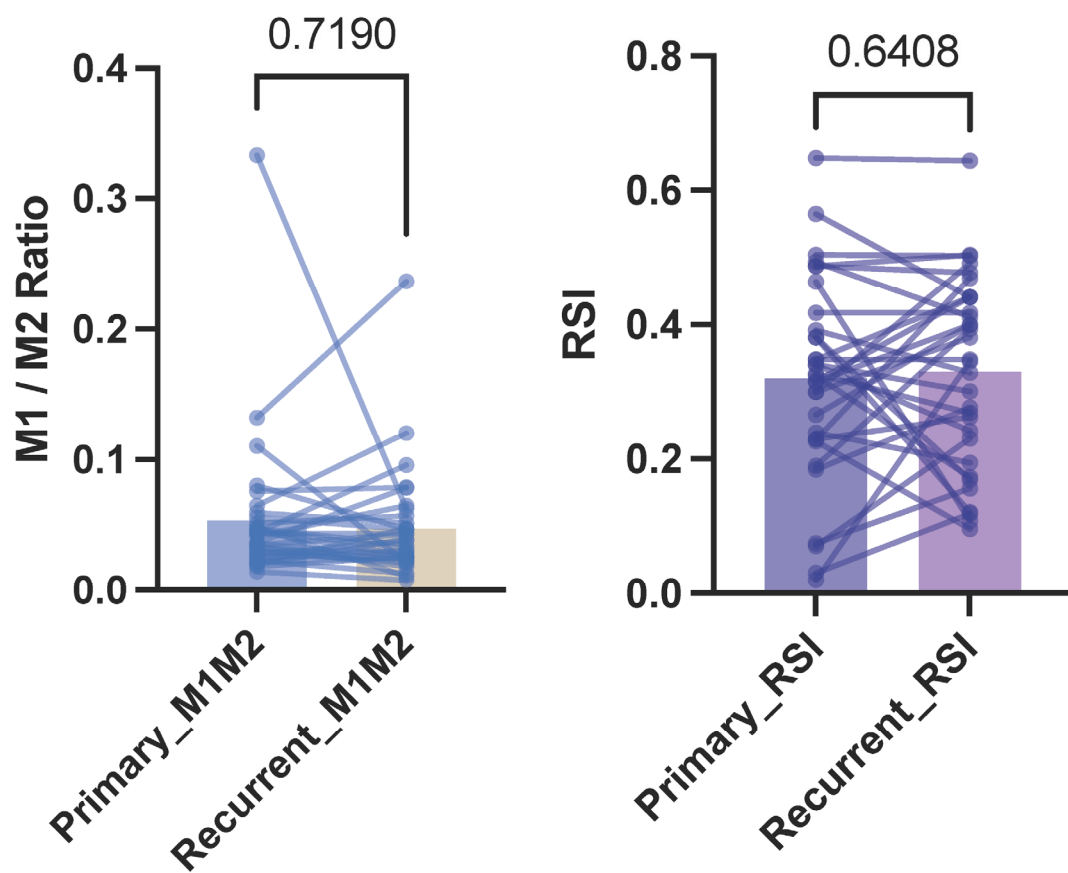

**Figure S2.** Comparison of M1/M2 macrophage ratios and RSI scores in paired primary and recurrent tumors.
