# Supplementary figures and images for: Relationship between Macrophage and Radiosensitivity in Human Primary and Recurrent Glioblastoma: In Silico Analysis with Publicly Available Datasets
Source: MDPI journal article supplement (doi:10.3390/biomedicines10020292), 2022-01-27

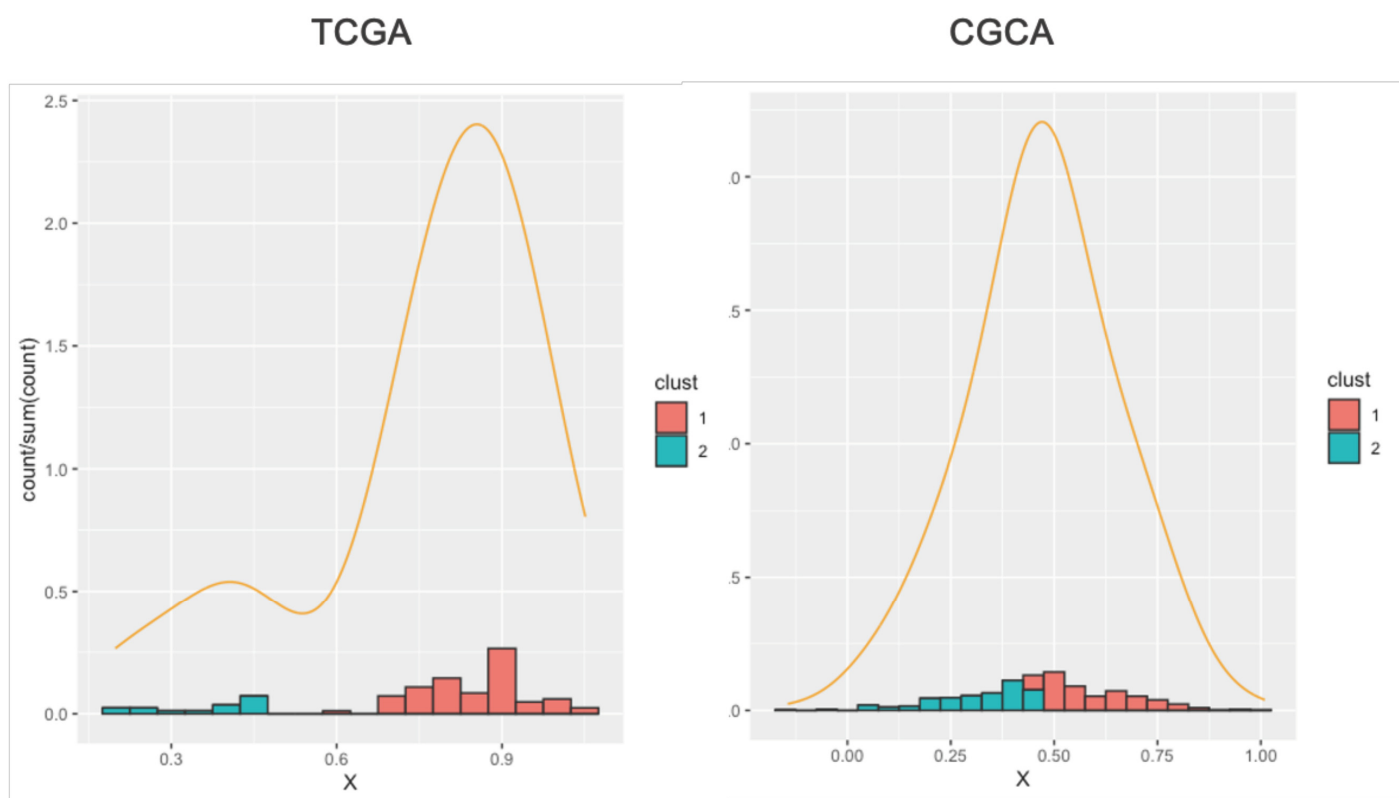

**Figure S1.** Distribution of RSI scores in the TCGA and CGGA datasets.

Supplement: s1 [file s1]
